# Supplementary material for: Effect of Graphite Nanoplatelet Size and Dispersion on the Thermal and Mechanical Properties of Epoxy-Based Nanocomposites
Source: MDPI journal article supplement (doi:10.3390/nano13081328), 2023-04-10
Supplement: s1 [file s1]

## **Supplementary information**

### **Effect of graphite nanoplatelet size and dispersion on the thermal and mechanical properties of epoxy-based nanocomposites**

Elsye Agustina, Jeungchoon Goak\*, Suntae Lee, Yongse Kim, Sung Chul Hong, Yongho Seo  
and Naesung Lee\*

Hybrid Materials Center (HMC), Department of Nanotechnology and Advanced Materials  
Engineering, Sejong University, 209 Neungdong-ro, Gwangjin-gu, Seoul 05006, Korea

\*E-mail: [jcgoak@sejong.ac.kr](mailto:jcgoak@sejong.ac.kr); [nslee@sejong.ac.kr](mailto:nslee@sejong.ac.kr)

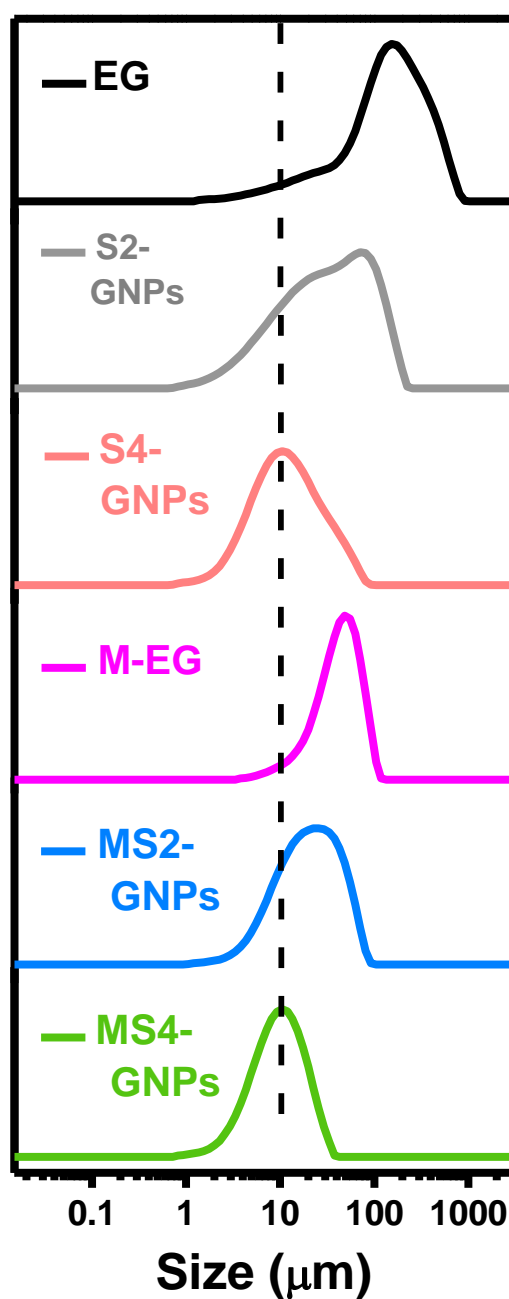

Figure S1. Particle size analyses of raw EG, S2- and S4-GNPs, M-EG, and MS2- and MS4-GNPs, measured by laser granulometry in acetone, where “S” and “M” denote sonication and milling, respectively, and the number indicates the sonication time in hours. EG: expanded graphite; GNP: graphite nanoplatelet.

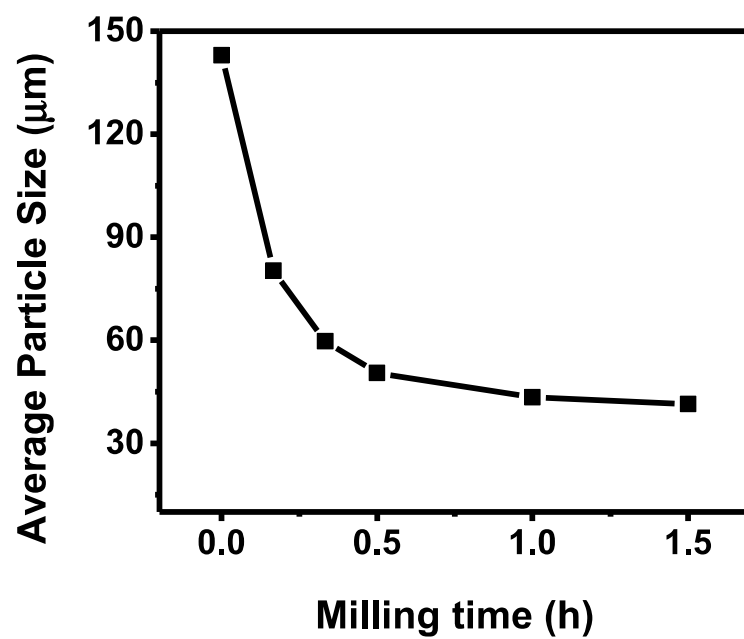

Figure S2. Average particle sizes of M-EG attrition-milled in IPA for various periods of time, measured using laser granulometry in acetone.

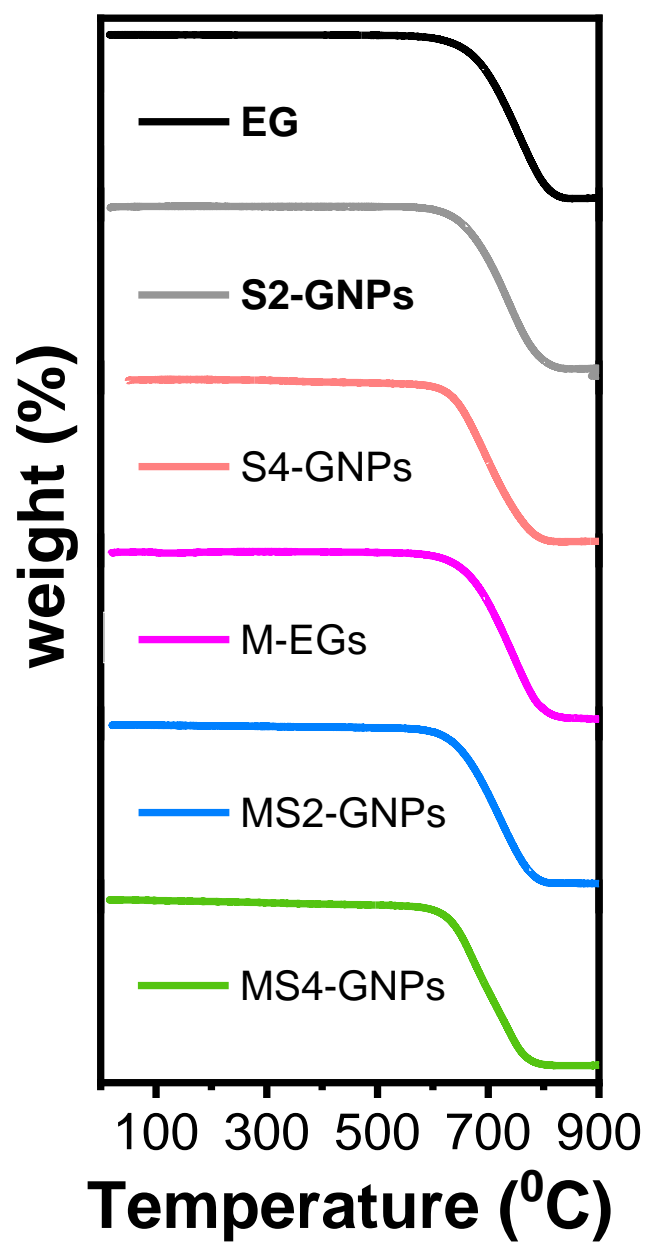

Figure S3. Thermogravimetric analysis of raw EG, S2- and S4-GNPs, M-EG, and MS2- and MS4-GNPs.

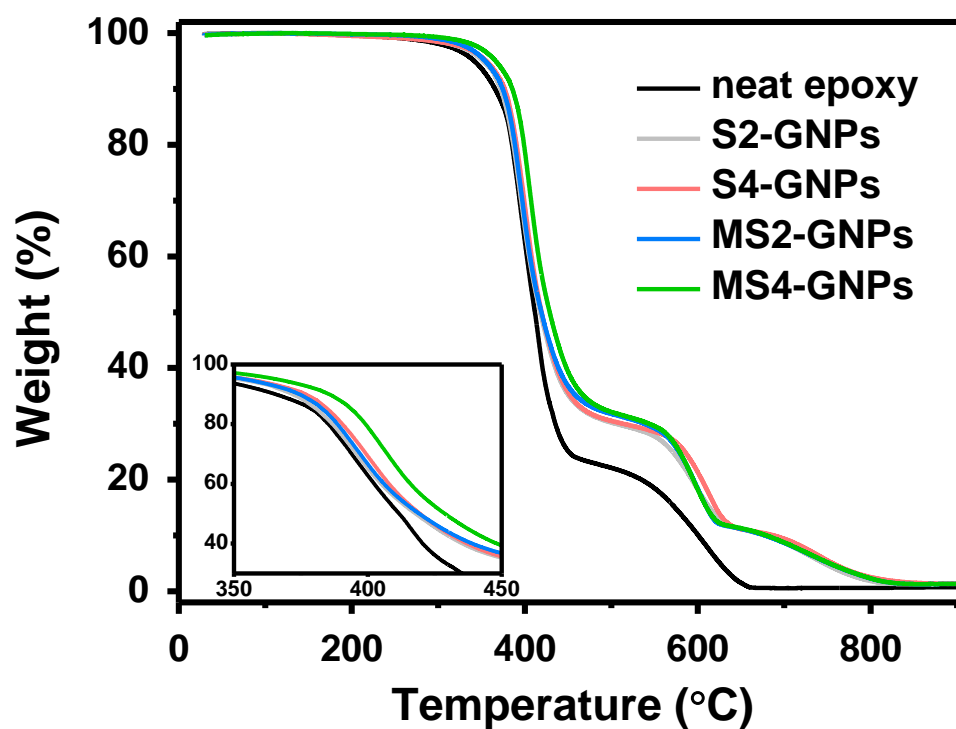

Figure S4. Thermogravimetric analysis of neat epoxy and GNP/epoxy nanocomposites with an inset to magnify the temperature region near 400°C, where epoxy decomposition occurs.

Table S1. Platelet sizes and thicknesses, surface areas, G-to-D peak intensity ratios (IG/ID), and oxidation temperatures (T<sub>ox</sub>) of EG and GNPs, measured using SEM, AFM, BET, Raman spectroscopy, and TGA, respectively. SEM: scanning electron microscopy; AFM: atomic force microscopy; BET: Brunauer–Emmett–Teller; TGA: thermogravimetric analysis.

| Samples  | SEM                             | Laser Granulometry              |           | BET                                           | AFM                                  | Raman spectroscopy             | TGA                  |
|----------|---------------------------------|---------------------------------|-----------|-----------------------------------------------|--------------------------------------|--------------------------------|----------------------|
|          | Platelet size (μm) <sup>a</sup> | Particle Size (μm) <sup>b</sup> | FWHM (μm) | Surface area (m <sup>2</sup> /g) <sup>c</sup> | Platelet thickness (nm) <sup>d</sup> | I <sub>G</sub> /I <sub>D</sub> | T <sub>ox</sub> (°C) |
| Raw EG   | -                               | 143 ± 2.3                       | 387.8     | 16.1                                          | -                                    | 8.0 ± 3.9                      | 743.9 ± 0.2          |
| M-EG     | -                               | 43.0 ± 0.0                      | 55.3      | 21.8                                          | -                                    | 7.0 ± 3.2                      | 732.4 ± 0.8          |
| S2-GNPs  | 3.0 ± 2.4                       | 31.8 ± 0.5                      | 136.5     | 20.8                                          | 164.2 ± 103.1                        | 7.2 ± 1.2                      | 734.4 ± 4.9          |
| S4-GNPs  | 2.0 ± 1.6                       | 11.4 ± 0.1                      | 23.9      | 23.7                                          | 33.4 ± 11.3                          | 6.2 ± 0.8                      | 704.0 ± 3.6          |
| MS2-GNPs | 2.0 ± 1.2                       | 20.3 ± 0.0                      | 51.8      | 23.6                                          | 112.1 ± 100.1                        | 6.3 ± 0.7                      | 715.1 ± 1.9          |
| MS4-GNPs | 1.6 ± 0.9                       | 9.6 ± 0.0                       | 24.1      | 30.2                                          | 21.3 ± 5.8                           | 4.9 ± 2.0                      | 697.1 ± 1.5          |

<sup>a</sup> Platelet sizes were measured for at least 150 platelets using SEM images.

<sup>b</sup> Particle sizes are the average values of D<sub>50</sub> sizes in the particle size distributions from three measurements.

<sup>c</sup> Surface areas were measured using the BET method.

<sup>d</sup> Platelet thicknesses were measured for at least 10 platelets using AFM.
